# Supplementary material for: A SaTScan™ macro accessory for cartography (SMAC) package implemented with SAS® software
Source: PubMed Central journal article supplement (PMC1821006; doi:10.1186/1476-072x-6-6), 2007-03-06
Supplement: 1476-072X-6-6-S1.pdf [file 1476-072X-6-6-S1.pdf]

---

SaTScan v5.1.1

---

Program run on: Tue Aug 23 08:17:49 2005

Prospective Space-Time analysis  
scanning for clusters with high rates  
using the Poisson model.

---

SUMMARY OF DATA

Study period.....: 2002/3/12 - 2002/9/9  
Number of locations...: 382  
Total population.....: 5508750  
Total cases.....: 48  
Annual cases / 100000.: 1.7

---

MOST LIKELY CLUSTER

1.Location IDs included.: 02482, 02481, 02462, 02492, 02494,  
01760  
Coordinates / radius..: (42.296345 N, 71.293221 W) / 5.44 km  
Time frame.....: 2002/9/6 - 2002/9/9  
Population.....: 88920  
Number of cases.....: 4  
Expected cases.....: 0.02  
Annual cases / 100000.: 410.8  
Observed / expected...: 234.900  
Log likelihood ratio..: 18.023758  
Monte Carlo rank.....: 1/1000  
P-value.....: 0.001  
Null Occurrence.....: Once in 2 years and 272 days

SECONDARY CLUSTERS

2.Location IDs included.: 01983, 01984, 01982, 01923, 01921,  
01949, 01969, 01833, 01915, 01960,  
01938, 01922, 01845, 01834, 01864,  
01929, 01940  
Coordinates / radius..: (42.640877 N, 70.935860 W) / 14.30 km  
Time frame.....: 2002/9/2 - 2002/9/9  
Population.....: 238503  
Number of cases.....: 2  
Expected cases.....: 0.09  
Annual cases / 100000.: 38.3  
Observed / expected...: 21.894  
Log likelihood ratio..: 4.302328  
Monte Carlo rank.....: 421/1000  
P-value.....: 0.421  
Null Occurrence.....: Once in 2 days

3.Location IDs included.: 02364, 02367, 02332, 02338, 02330,

02359, 02341, 02050, 02346, 02360,  
02366, 02333, 02339, 02324, 02382,  
02061, 02358, 02370, 02576, 02379,  
02571, 02302, 02351, 02767, 02538,  
02066, 02718, 02347, 02770, 02190,  
02558, 02301, 02343, 02532, 02025,  
02043, 02738, 02189, 02322, 02375,  
02188, 02780, 02779, 02743, 02717,  
02368, 02356, 02184, 02191, 02702,  
02072, 02559, 02739, 02045, 02542,  
02563, 02169, 02534, 02745, 02766,  
02715, 02764, 02021, 02537, 02644,  
02170, 02048, 02746, 02556, 02067,  
02186, 02720, 02171, 02726, 02747,  
02719, 02740, 02035, 02668, 02122,  
02126, 02124, 02032, 02744, 02062,  
02648, 02136, 02536, 02125, 02769,  
02657, 02723, 02121

Coordinates / radius..: (41.983871 N, 70.741760 W) / 45.73 km  
Time frame.....: 2002/9/4 - 2002/9/9  
Population.....: 1471875  
Number of cases.....: 3  
Expected cases.....: 0.42  
Annual cases / 100000.: 12.4  
Observed / expected...: 7.095  
Log likelihood ratio..: 3.372279  
Monte Carlo rank.....: 554/1000  
P-value.....: 0.554  
Null Occurrence.....: Once in 2 days

The log likelihood ratio value required for an observed  
cluster to be significant at level  
... 0.01: 10.913655  
... 0.05: 8.495663

---

#### PARAMETER SETTINGS

##### Input Files

-----

Case File : c:\SMAC\SaTScan files\cases.txt  
Population File : c:\SMAC\SaTScan files\population.txt  
Coordinates File : c:\SMAC\satscan files\zipcodes.txt

Time Precision : Day  
Coordinates : Latitude/Longitude

##### Analysis

-----

Type of Analysis : Prospective Space-Time  
Probability Model : Poisson  
Scan for Areas with : High Rates

Start Date : 2002/3/12  
End Date : 2002/9/9

Number of Replications : 999

Scanning Window

-----

Maximum Spatial Cluster Size : 50.00 %  
Also Include Purely Temporal Clusters : No  
Maximum Temporal Cluster Size : 14.00 Days  
Also Include Purely Spatial Clusters : No

Time Parameters

-----

Time Aggregation Units : Day  
Time Aggregation Length : 1  
  
Temporal Adjustment : None  
Spatial Adjustment : None  
Adjusted for Earlier Analyses : No

Output

-----

Results File : c:\SMAC\SaTScan files\crypto output.txt  
Cluster File : c:\SMAC\SaTScan files\crypto output.col.txt  
Location File : c:\SMAC\SaTScan files\crypto output.gis.txt  
Simulated LLRs File : c:\SMAC\SaTScan files\crypto output.llr.txt

Criteria for Reporting Secondary Clusters : No Geographical Overlap

---

Program completed : Tue Aug 23 08:18:16 2005  
Total Running Time : 27 seconds
