# Supplementary material for: A SaTScan™ macro accessory for cartography (SMAC) package implemented with SAS® software
Source: PubMed Central journal article supplement (PMC1821006; doi:10.1186/1476-072x-6-6), 2007-03-06
Supplement: 1476-072X-6-6-S2.pdf [file 1476-072X-6-6-S2.pdf]

| Most<br>Central<br>Location | Cluster<br>Number | x-coord.<br>or<br>latitude | y-coord.<br>or<br>longitude | Circle<br>Radius | #<br>Location<br>IDs | Observed<br>Cases | Expected<br>Cases | Observed/<br>Expected<br>in cluster | LLR or<br>Test<br>Statistic | p-value<br>of<br>cluster | Cluster<br>Start<br>Date | Cluster<br>End<br>Date |
|-----------------------------|-------------------|----------------------------|-----------------------------|------------------|----------------------|-------------------|-------------------|-------------------------------------|-----------------------------|--------------------------|--------------------------|------------------------|
| 02482                       | 1                 | 42.2963                    | -71.2932                    | 5.44             | 6                    | 4                 | 0.02              | 234.90                              | 18.023758                   | 0.00100                  | 2002/9/6                 | 2002/9/9               |
| 01983                       | 2                 | 42.6409                    | -70.9359                    | 14.30            | 17                   | 2                 | 0.09              | 21.89                               | 4.302328                    | 0.42100                  | 2002/9/2                 | 2002/9/9               |
| 02364                       | 3                 | 41.9839                    | -70.7418                    | 45.73            | 93                   | 3                 | 0.42              | 7.10                                | 3.372279                    | 0.55400                  | 2002/9/4                 | 2002/9/9               |
