# Supplementary material for: A SaTScan™ macro accessory for cartography (SMAC) package implemented with SAS® software
Source: PubMed Central journal article supplement (PMC1821006; doi:10.1186/1476-072x-6-6), 2007-03-06
Supplement: 1476-072X-6-6-S3.pdf [file 1476-072X-6-6-S3.pdf]

| Location ID | Cluster Number | Observed Cases in Cluster | Expected Cases in Cluster | Observed/Expected in Cluster | p-value in Cluster | Observed Cases in Location | Expected Cases in Location | Observed/Expected in Location |
|-------------|----------------|---------------------------|---------------------------|------------------------------|--------------------|----------------------------|----------------------------|-------------------------------|
| 02482       | 1              | 4                         | 0.02                      | 234.900                      | 0.00100            | 0                          | 0.00                       | 0.000                         |
| 02481       | 1              | 4                         | 0.02                      | 234.900                      | 0.00100            | 2                          | 0.00                       | 737.131                       |
| 02462       | 1              | 4                         | 0.02                      | 234.900                      | 0.00100            | 0                          | 0.00                       | 0.000                         |
| 02492       | 1              | 4                         | 0.02                      | 234.900                      | 0.00100            | 0                          | 0.00                       | 0.000                         |
| 02494       | 1              | 4                         | 0.02                      | 234.900                      | 0.00100            | 0                          | 0.00                       | 0.000                         |
| 01760       | 1              | 4                         | 0.02                      | 234.900                      | 0.00100            | 2                          | 0.01                       | 327.717                       |
| 01983       | 2              | 2                         | 0.09                      | 21.894                       | 0.42100            | 0                          | 0.00                       | 0.000                         |
| 01984       | 2              | 2                         | 0.09                      | 21.894                       | 0.42100            | 0                          | 0.00                       | 0.000                         |
| 01982       | 2              | 2                         | 0.09                      | 21.894                       | 0.42100            | 0                          | 0.00                       | 0.000                         |
| 01923       | 2              | 2                         | 0.09                      | 21.894                       | 0.42100            | 0                          | 0.01                       | 0.000                         |
| 01921       | 2              | 2                         | 0.09                      | 21.894                       | 0.42100            | 0                          | 0.00                       | 0.000                         |
| 01949       | 2              | 2                         | 0.09                      | 21.894                       | 0.42100            | 0                          | 0.00                       | 0.000                         |
| 01969       | 2              | 2                         | 0.09                      | 21.894                       | 0.42100            | 0                          | 0.00                       | 0.000                         |
| 01833       | 2              | 2                         | 0.09                      | 21.894                       | 0.42100            | 0                          | 0.00                       | 0.000                         |
| 01915       | 2              | 2                         | 0.09                      | 21.894                       | 0.42100            | 0                          | 0.02                       | 0.000                         |
| 01960       | 2              | 2                         | 0.09                      | 21.894                       | 0.42100            | 1                          | 0.02                       | 54.248                        |
| 01938       | 2              | 2                         | 0.09                      | 21.894                       | 0.42100            | 0                          | 0.00                       | 0.000                         |
| 01922       | 2              | 2                         | 0.09                      | 21.894                       | 0.42100            | 0                          | 0.00                       | 0.000                         |
| 01845       | 2              | 2                         | 0.09                      | 21.894                       | 0.42100            | 0                          | 0.01                       | 0.000                         |
| 01834       | 2              | 2                         | 0.09                      | 21.894                       | 0.42100            | 0                          | 0.00                       | 0.000                         |
| 01864       | 2              | 2                         | 0.09                      | 21.894                       | 0.42100            | 0                          | 0.01                       | 0.000                         |
| 01929       | 2              | 2                         | 0.09                      | 21.894                       | 0.42100            | 0                          | 0.00                       | 0.000                         |
| 01940       | 2              | 2                         | 0.09                      | 21.894                       | 0.42100            | 1                          | 0.00                       | 226.210                       |
| 02364       | 3              | 3                         | 0.42                      | 7.095                        | 0.55400            | 0                          | 0.00                       | 0.000                         |
| 02367       | 3              | 3                         | 0.42                      | 7.095                        | 0.55400            | 0                          | 0.00                       | 0.000                         |
| 02332       | 3              | 3                         | 0.42                      | 7.095                        | 0.55400            | 0                          | 0.00                       | 0.000                         |
| 02338       | 3              | 3                         | 0.42                      | 7.095                        | 0.55400            | 0                          | 0.00                       | 0.000                         |
| 02330       | 3              | 3                         | 0.42                      | 7.095                        | 0.55400            | 0                          | 0.00                       | 0.000                         |
| 02359       | 3              | 3                         | 0.42                      | 7.095                        | 0.55400            | 0                          | 0.00                       | 0.000                         |
| 02341       | 3              | 3                         | 0.42                      | 7.095                        | 0.55400            | 0                          | 0.00                       | 0.000                         |
| 02050       | 3              | 3                         | 0.42                      | 7.095                        | 0.55400            | 0                          | 0.01                       | 0.000                         |
| 02346       | 3              | 3                         | 0.42                      | 7.095                        | 0.55400            | 0                          | 0.01                       | 0.000                         |
| 02360       | 3              | 3                         | 0.42                      | 7.095                        | 0.55400            | 0                          | 0.01                       | 0.000                         |
| 02366       | 3              | 3                         | 0.42                      | 7.095                        | 0.55400            | 0                          | 0.00                       | 0.000                         |
| 02333       | 3              | 3                         | 0.42                      | 7.095                        | 0.55400            | 0                          | 0.00                       | 0.000                         |
| 02339       | 3              | 3                         | 0.42                      | 7.095                        | 0.55400            | 0                          | 0.00                       | 0.000                         |
| 02324       | 3              | 3                         | 0.42                      | 7.095                        | 0.55400            | 0                          | 0.01                       | 0.000                         |
| 02382       | 3              | 3                         | 0.42                      | 7.095                        | 0.55400            | 0                          | 0.00                       | 0.000                         |
| 02061       | 3              | 3                         | 0.42                      | 7.095                        | 0.55400            | 0                          | 0.00                       | 0.000                         |

|       |   |   |      |       |         |   |      |       |
|-------|---|---|------|-------|---------|---|------|-------|
| 02358 | 3 | 3 | 0.42 | 7.095 | 0.55400 | 0 | 0.00 | 0.000 |
| 02370 | 3 | 3 | 0.42 | 7.095 | 0.55400 | 0 | 0.01 | 0.000 |
| 02576 | 3 | 3 | 0.42 | 7.095 | 0.55400 | 0 | 0.00 | 0.000 |
| 02379 | 3 | 3 | 0.42 | 7.095 | 0.55400 | 0 | 0.00 | 0.000 |
| 02571 | 3 | 3 | 0.42 | 7.095 | 0.55400 | 0 | 0.00 | 0.000 |
| 02302 | 3 | 3 | 0.42 | 7.095 | 0.55400 | 0 | 0.01 | 0.000 |
| 02351 | 3 | 3 | 0.42 | 7.095 | 0.55400 | 0 | 0.00 | 0.000 |
| 02767 | 3 | 3 | 0.42 | 7.095 | 0.55400 | 0 | 0.00 | 0.000 |
| 02538 | 3 | 3 | 0.42 | 7.095 | 0.55400 | 0 | 0.00 | 0.000 |
| 02066 | 3 | 3 | 0.42 | 7.095 | 0.55400 | 0 | 0.00 | 0.000 |
| 02718 | 3 | 3 | 0.42 | 7.095 | 0.55400 | 0 | 0.00 | 0.000 |
| 02347 | 3 | 3 | 0.42 | 7.095 | 0.55400 | 0 | 0.00 | 0.000 |
| 02770 | 3 | 3 | 0.42 | 7.095 | 0.55400 | 0 | 0.00 | 0.000 |
| 02190 | 3 | 3 | 0.42 | 7.095 | 0.55400 | 0 | 0.00 | 0.000 |
| 02558 | 3 | 3 | 0.42 | 7.095 | 0.55400 | 0 | 0.00 | 0.000 |
| 02301 | 3 | 3 | 0.42 | 7.095 | 0.55400 | 0 | 0.02 | 0.000 |
| 02343 | 3 | 3 | 0.42 | 7.095 | 0.55400 | 0 | 0.00 | 0.000 |
| 02532 | 3 | 3 | 0.42 | 7.095 | 0.55400 | 0 | 0.00 | 0.000 |
| 02025 | 3 | 3 | 0.42 | 7.095 | 0.55400 | 0 | 0.00 | 0.000 |
| 02043 | 3 | 3 | 0.42 | 7.095 | 0.55400 | 0 | 0.01 | 0.000 |
| 02738 | 3 | 3 | 0.42 | 7.095 | 0.55400 | 0 | 0.00 | 0.000 |
| 02189 | 3 | 3 | 0.42 | 7.095 | 0.55400 | 0 | 0.00 | 0.000 |
| 02322 | 3 | 3 | 0.42 | 7.095 | 0.55400 | 0 | 0.00 | 0.000 |
| 02375 | 3 | 3 | 0.42 | 7.095 | 0.55400 | 0 | 0.00 | 0.000 |
| 02188 | 3 | 3 | 0.42 | 7.095 | 0.55400 | 0 | 0.00 | 0.000 |
| 02780 | 3 | 3 | 0.42 | 7.095 | 0.55400 | 0 | 0.01 | 0.000 |
| 02779 | 3 | 3 | 0.42 | 7.095 | 0.55400 | 0 | 0.00 | 0.000 |
| 02743 | 3 | 3 | 0.42 | 7.095 | 0.55400 | 0 | 0.00 | 0.000 |
| 02717 | 3 | 3 | 0.42 | 7.095 | 0.55400 | 0 | 0.00 | 0.000 |
| 02368 | 3 | 3 | 0.42 | 7.095 | 0.55400 | 0 | 0.01 | 0.000 |
| 02356 | 3 | 3 | 0.42 | 7.095 | 0.55400 | 0 | 0.00 | 0.000 |
| 02184 | 3 | 3 | 0.42 | 7.095 | 0.55400 | 0 | 0.01 | 0.000 |
| 02191 | 3 | 3 | 0.42 | 7.095 | 0.55400 | 0 | 0.00 | 0.000 |
| 02702 | 3 | 3 | 0.42 | 7.095 | 0.55400 | 0 | 0.00 | 0.000 |
| 02072 | 3 | 3 | 0.42 | 7.095 | 0.55400 | 0 | 0.01 | 0.000 |
| 02559 | 3 | 3 | 0.42 | 7.095 | 0.55400 | 0 | 0.00 | 0.000 |
| 02739 | 3 | 3 | 0.42 | 7.095 | 0.55400 | 0 | 0.00 | 0.000 |
| 02045 | 3 | 3 | 0.42 | 7.095 | 0.55400 | 0 | 0.00 | 0.000 |
| 02542 | 3 | 3 | 0.42 | 7.095 | 0.55400 | 0 | 0.00 | 0.000 |
| 02563 | 3 | 3 | 0.42 | 7.095 | 0.55400 | 0 | 0.00 | 0.000 |
| 02169 | 3 | 3 | 0.42 | 7.095 | 0.55400 | 0 | 0.01 | 0.000 |
| 02534 | 3 | 3 | 0.42 | 7.095 | 0.55400 | 0 | 0.00 | 0.000 |

|       |   |   |      |       |         |   |      |         |
|-------|---|---|------|-------|---------|---|------|---------|
| 02745 | 3 | 3 | 0.42 | 7.095 | 0.55400 | 0 | 0.01 | 0.000   |
| 02766 | 3 | 3 | 0.42 | 7.095 | 0.55400 | 0 | 0.01 | 0.000   |
| 02715 | 3 | 3 | 0.42 | 7.095 | 0.55400 | 0 | 0.00 | 0.000   |
| 02764 | 3 | 3 | 0.42 | 7.095 | 0.55400 | 0 | 0.00 | 0.000   |
| 02021 | 3 | 3 | 0.42 | 7.095 | 0.55400 | 0 | 0.01 | 0.000   |
| 02537 | 3 | 3 | 0.42 | 7.095 | 0.55400 | 0 | 0.00 | 0.000   |
| 02644 | 3 | 3 | 0.42 | 7.095 | 0.55400 | 0 | 0.00 | 0.000   |
| 02170 | 3 | 3 | 0.42 | 7.095 | 0.55400 | 0 | 0.01 | 0.000   |
| 02048 | 3 | 3 | 0.42 | 7.095 | 0.55400 | 0 | 0.01 | 0.000   |
| 02746 | 3 | 3 | 0.42 | 7.095 | 0.55400 | 0 | 0.00 | 0.000   |
| 02556 | 3 | 3 | 0.42 | 7.095 | 0.55400 | 0 | 0.00 | 0.000   |
| 02067 | 3 | 3 | 0.42 | 7.095 | 0.55400 | 0 | 0.00 | 0.000   |
| 02186 | 3 | 3 | 0.42 | 7.095 | 0.55400 | 0 | 0.01 | 0.000   |
| 02720 | 3 | 3 | 0.42 | 7.095 | 0.55400 | 0 | 0.01 | 0.000   |
| 02171 | 3 | 3 | 0.42 | 7.095 | 0.55400 | 0 | 0.00 | 0.000   |
| 02726 | 3 | 3 | 0.42 | 7.095 | 0.55400 | 0 | 0.00 | 0.000   |
| 02747 | 3 | 3 | 0.42 | 7.095 | 0.55400 | 0 | 0.01 | 0.000   |
| 02719 | 3 | 3 | 0.42 | 7.095 | 0.55400 | 0 | 0.00 | 0.000   |
| 02740 | 3 | 3 | 0.42 | 7.095 | 0.55400 | 0 | 0.01 | 0.000   |
| 02035 | 3 | 3 | 0.42 | 7.095 | 0.55400 | 0 | 0.00 | 0.000   |
| 02668 | 3 | 3 | 0.42 | 7.095 | 0.55400 | 0 | 0.00 | 0.000   |
| 02122 | 3 | 3 | 0.42 | 7.095 | 0.55400 | 0 | 0.01 | 0.000   |
| 02126 | 3 | 3 | 0.42 | 7.095 | 0.55400 | 0 | 0.01 | 0.000   |
| 02124 | 3 | 3 | 0.42 | 7.095 | 0.55400 | 0 | 0.01 | 0.000   |
| 02032 | 3 | 3 | 0.42 | 7.095 | 0.55400 | 0 | 0.00 | 0.000   |
| 02744 | 3 | 3 | 0.42 | 7.095 | 0.55400 | 0 | 0.00 | 0.000   |
| 02062 | 3 | 3 | 0.42 | 7.095 | 0.55400 | 0 | 0.01 | 0.000   |
| 02648 | 3 | 3 | 0.42 | 7.095 | 0.55400 | 0 | 0.00 | 0.000   |
| 02136 | 3 | 3 | 0.42 | 7.095 | 0.55400 | 0 | 0.01 | 0.000   |
| 02536 | 3 | 3 | 0.42 | 7.095 | 0.55400 | 0 | 0.01 | 0.000   |
| 02125 | 3 | 3 | 0.42 | 7.095 | 0.55400 | 0 | 0.01 | 0.000   |
| 02769 | 3 | 3 | 0.42 | 7.095 | 0.55400 | 1 | 0.00 | 344.335 |
| 02657 | 3 | 3 | 0.42 | 7.095 | 0.55400 | 0 | 0.00 | 0.000   |
| 02723 | 3 | 3 | 0.42 | 7.095 | 0.55400 | 0 | 0.00 | 0.000   |
| 02121 | 3 | 3 | 0.42 | 7.095 | 0.55400 | 2 | 0.01 | 277.864 |

---
