# Supplementary material for: A SaTScan™ macro accessory for cartography (SMAC) package implemented with SAS® software
Source: PubMed Central journal article supplement (PMC1821006; doi:10.1186/1476-072x-6-6), 2007-03-06
Supplement: 1476-072X-6-6-S4.pdf [file 1476-072X-6-6-S4.pdf]

```

%macro inputdata(datadir=, signaldate=, ndays=, coordinates_sas=,
coordinates_text=, cases_sas=, cases_text=, population_sas=,
population_text=);

libname a "&datadir";

%put; %put;
/* Check for the existence of &zipds SAS data set. If it does not
exist, write an error message in the log and exit the macro */
%if %sysfunc(exist(a.&coordinates_sas))=0 %then %do;
    %put ERROR: The SAS data set "a.&coordinates_sas", which should
contain the location IDs, does not exist. The INPUTDATA macro will
stop running.;
    %goto exit;
%end;

/* If the &zipds data set does exist, check to make sure that the 3
required variables exist. If any of them are missing, write an error
message in the log and exit the macro */
%else %do;
    %let zipck=%sysfunc(open(a.&coordinates_sas,i));
    %if %sysfunc(varnum(&zipck,x))=0 %then %put ERROR: The required
variable "x", which should contain the longitude, was not found in the
data set "a.&coordinates_sas". The INPUTDATA macro will stop running.;
    %if %sysfunc(varnum(&zipck,y))=0 %then %put ERROR: The required
variable "y", which should contain the latitude, was not found in the
data set "a.&coordinates_sas". The INPUTDATA macro will stop running.;
    %if %sysfunc(varnum(&zipck,zip))=0 %then %put ERROR: The required
variable "zip", which should contain the location ID, was not found in
the data set "a.&coordinates_sas". The INPUTDATA macro will stop
running.;
    %if (%sysfunc(varnum(&zipck,x))=0 or %sysfunc(varnum(&zipck,y))=0
or %sysfunc(varnum(&zipck,zip))=0) %then %do;
        %let close=%sysfunc(close(&zipck));
        %goto exit;
    %end;
%end;
%let close=%sysfunc(close(&zipck));

/* Check for the existence of &popds SAS data set. If it does not
exist, write an error message in the log and exit the macro */
%if %sysfunc(exist(a.&population_sas))=0 %then %do;
    %put ERROR: The SAS data set "a.&population_sas", which should
contain the population for each location ID/date pair, does not exist.
The INPUTDATA macro will stop running.;
    %goto exit;
%end;

/* If the &popds data set does exist, check to make sure that the 3
required variables exist. If any of them are missing, write an error
message in the log and exit the macro */
%else %do;
    %let popck=%sysfunc(open(a.&population_sas,i));
    %if %sysfunc(varnum(&popck,pop))=0 %then %put ERROR: The
required variable "pop", which should contain the population, was not

```

```

found in the data set "a.&population_sas". The INPUTDATA macro will
stop running.;
    %if %sysfunc(varnum(&popck,zip))=0 %then %put ERROR: The
required variable "zip", which should contain the location ID, was not
found in the data set "a.&population_sas". The INPUTDATA macro will
stop running.;
    %if (%sysfunc(varnum(&popck,pop))=0 or
%sysfunc(varnum(&popck,zip))=0) %then %do;
        %let close=%sysfunc(close(&popck));
        %goto exit;
    %end;
    %let popdate=%sysfunc(varnum(&popck,date));
    %if (&popdate=0) %then %put WARNING: The required variable "date"
was not found in the data set "a.&population_sas". It will be assumed
that the population is the same every day in each location ID.;
%end;
%let close=%sysfunc(close(&popck));

/* Check for the existence of &cases SAS data set. If it does not
exist, write an error message in the log and exit the macro */
%if %sysfunc(exist(a.&cases_sas))=0 %then %do;
    %put ERROR: The SAS data set "a.&cases_sas", which should contain
the number of cases for each location ID/date pair, does not exist.
The INPUTDATA macro will stop running.;
    %goto exit;
%end;

/* If the &cases data set does exist, check to make sure that the 3
required variables exist. If any of them are missing, write an error
message in the log and exit the macro */
%else %do;
    %let caseck=%sysfunc(open(a.&cases_sas,i));
    %if %sysfunc(varnum(&caseck,count))=0 %then %put ERROR: The
required variable "count", which should contain the number of cases,
was not found in the data set "a.&cases_sas". The INPUTDATA macro will
stop running.;
    %if %sysfunc(varnum(&caseck,date))=0 %then %put ERROR: The
required variable "date" was not found in the data set "a.&cases_sas".
The INPUTDATA macro will stop running.;
    %if %sysfunc(varnum(&caseck,zip))=0 %then %put ERROR: The
required variable "zip", which should contain the location ID, was not
found in the data set "a.&cases_sas". The INPUTDATA macro will stop
running.;
    %if (%sysfunc(varnum(&caseck,count))=0 or
%sysfunc(varnum(&caseck,date))=0 or %sysfunc(varnum(&caseck,zip))=0)
%then %do;
        %let close=%sysfunc(close(&caseck));
        %goto exit;
    %end;
%end;
%let close=%sysfunc(close(&caseck));

/* Now run the macro if there were no errors */
data dates;
    startdate = input("&signaldate", mmdyy10.)-&ndays+1;

```

```

        enddate = input("&signaldate", mmddyy10.);
        format startdate enddate mmddyy10.;
run;
proc print data=dates noobs; run;

%if &popdate=0 %then %do;
    proc sort data=a.&population_sas; by zip descending pop; run;
    data population;
        set a.&population_sas;
        by zip;
        if first.zip;
        do i=input("&signaldate", mmddyy10.)-&ndays to
input("&signaldate", mmddyy10.);
            date=i;
            output;
        end;
    run;
%end;
%else %if &popdate gt 0 %then %do;
    data population;
        set a.&population_sas;
    run;
%end;

proc sort data=a.&coordinates_sas; by zip; run;
proc sort data=population; by zip; run;
data zips;
    merge population(in=keeppop where=(date=input("&signaldate",
mmddyy10.))) a.&coordinates_sas(in=location);
    by zip;
    if keeppop and location;
    file "&coordinates_text..txt";
    put zip y x;
run;

/* Check for the existence of the location file. If it does not exist,
write an error message in the log and exit the macro */
%if %sysfunc(fileexist(&coordinates_text..txt))=0 %then %do;
    %put ERROR: The file "&coordinates_text..txt", which should
contain the location information for SaTScan, was not created. Check
to see if the directory exists. The INPUTDATA macro will stop
running.;
    %goto exit;
%end;

proc sort data=a.&cases_sas; by zip; run;
data _null_;
    merge a.&cases_sas(in=case) zips(in=location keep=zip);
    by zip;
    if case and location and input("&signaldate", mmddyy10.)-&ndays
lt date le input("&signaldate", mmddyy10.);
    if (vtype(zip)='N' and zip ne .) or (vtype(zip)='C' and zip ne '
');
    if vtype(count)='N' and count=. then count=0;
    else if vtype(count)='C' and count=' ' then count='0';
    file "&cases_text..txt";
    put zip count date yymmddS10.;

```

```

run;

/* Check for the existence of the case file.  If it does not exist,
write an error message in the log and exit the macro */
%if %sysfunc(fileexist(&cases_text..txt))=0 %then %do;
    %put ERROR: The file "&cases_text..txt", which should contain the
case information for SaTScan, was not created.  Check to see if the
directory exists.  The INPUTDATA macro will stop running.;
    %goto exit;
%end;

data _null_;
    * Make the population file for SaTScan;
    merge population(in=keeppop) zips(in=location keep=zip);
    by zip;
    if keeppop and location and input("&signaldate", mmddyy10.)-
&ndays lt date le input("&signaldate", mmddyy10.);
    file "&population_text..txt";
    put zip date yymmddS10. ' ' pop;
run;

/* Check for the existence of the location file.  If it does not exist,
write an error message in the log and exit the macro */
%if %sysfunc(fileexist(&population_text..txt))=0 %then %do;
    %put ERROR: The file "&population_text..txt", which should
contain the population information for SaTScan, was not created.  Check
to see if the directory exists.  The INPUTDATA macro will stop
running.;
    %goto exit;
%end;
%exit: %mend inputdata;

```
