# Supplementary material for: A SaTScan™ macro accessory for cartography (SMAC) package implemented with SAS® software
Source: PubMed Central journal article supplement (PMC1821006; doi:10.1186/1476-072x-6-6), 2007-03-06
Supplement: 1476-072X-6-6-S8.pdf [file 1476-072X-6-6-S8.pdf]

[Input]

CaseFile=c:\SMAC\SaTScan files\cases.txt  
PopulationFile=c:\SMAC\SaTScan files\population.txt  
CoordinatesFile=c:\SMAC\satscan files\zipcodes.txt  
UseGridFile=n  
GridFile=  
PrecisionCaseTimes=3  
CoordinatesType=1  
StartDate=2002/03/12  
EndDate=2002/09/09

[Analysis]

AnalysisType=4  
ModelType=0  
ScanAreas=1  
TimeAggregationUnits=3  
TimeAggregationLength=1  
MonteCarloReps=999

[Output]

ResultsFile=c:\SMAC\SaTScan files\crypto output.txt  
SaveSimLLRsASCII=n  
SaveSimLLRsDBase=n  
IncludeRelativeRisksCensusAreasASCII=n  
IncludeRelativeRisksCensusAreasDBase=n  
CensusAreasReportedClustersASCII=y  
CensusAreasReportedClustersDBase=n  
MostLikelyClusterEachCentroidASCII=y  
MostLikelyClusterEachCentroidDBase=n

[Spatial Window]

MaxGeographicSize=50  
IncludePurelyTemporal=n  
MaxSpatialSizeInterpretation=0  
MaxCirclePopulationFile=

[Temporal Window]

MaxTemporalSize=14  
IncludePurelySpatial=n  
MaxTemporalSizeInterpretation=1  
IncludeClusters=0

[Space and Time Adjustments]

IntervalStartRange=2000/1/1,2000/12/31  
IntervalEndRange=2000/1/1,2000/12/31  
TimeTrendAdjustmentType=0  
TimeTrendPercentage=0.000000  
AdjustmentsByKnownRelativeRisksFilename=  
UseAdjustmentsByRRFile=n  
SpatialAdjustmentType=0

[Inference]

ProspectiveStartDate=2002/09/09  
EarlySimulationTermination=y  
AdjustForEarlierAnalyses=n

[Clusters Reported]

CriteriaForReportingSecondaryClusters=0  
MaxReportedGeoClusterSize=50  
UseReportOnlySmallerClusters=n

[BatchMode Features]  
ValidateParameters=y

[System]  
; system setting - do not modify  
Version=5.1.0
